# Supplementary material for: Hop Leaves as an Alternative Source of Health-Active Compounds: Effect of Genotype and Drying Conditions
Source: MDPI journal article supplement (doi:10.3390/plants11010099), 2021-12-29

**Figure S2.** Average IR spectra of *Humulus lupulus* leaves from different varieties: influence of drying treatments on each hop variety analysed. FD: freeze-dried samples; OD: oven-dried samples. A) V1: Chinook hop leaves; b) V2: Centennial hop leaves; c) V3: Comet hop leaves; d) V4: Columbus hop leaves; e) V5: Cascade hop leaves.

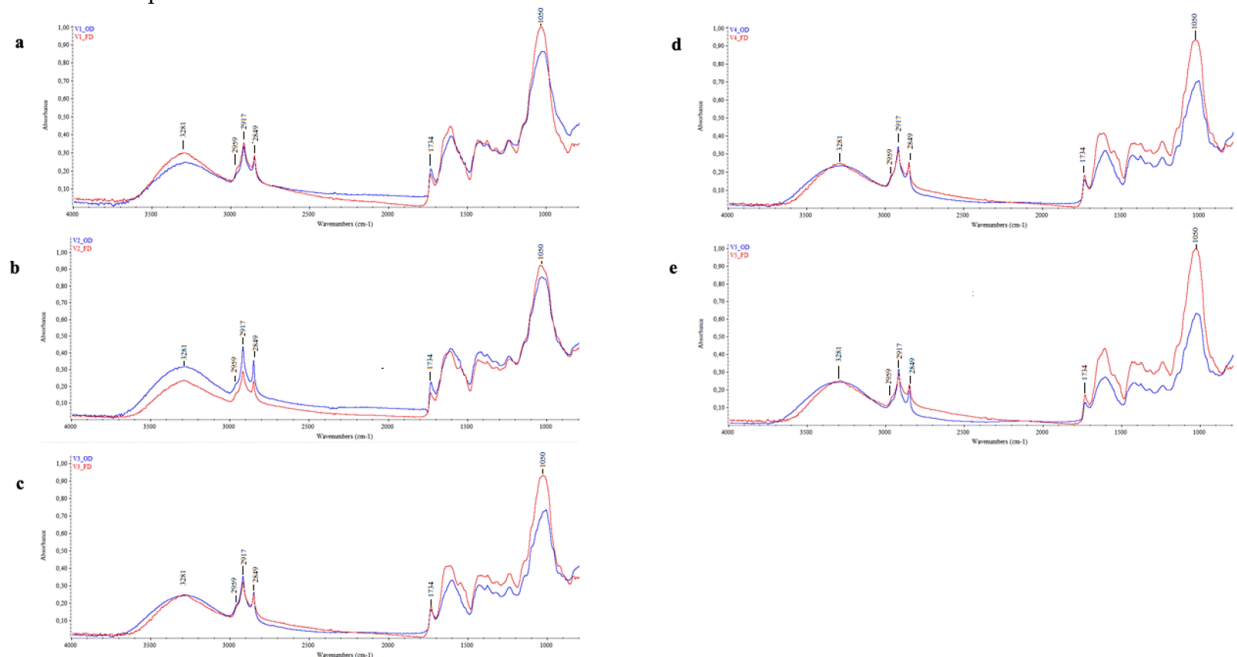

Supplement: s1 [file s1]
