# Supplementary material for: Hop Leaves as an Alternative Source of Health-Active Compounds: Effect of Genotype and Drying Conditions
Source: MDPI journal article supplement (doi:10.3390/plants11010099), 2021-12-29

**Figure S1.** Second derivative IR spectra of samples analyzed. Red line indicates freeze-dried (FD) samples and blue line oven-dried (OD) ones.

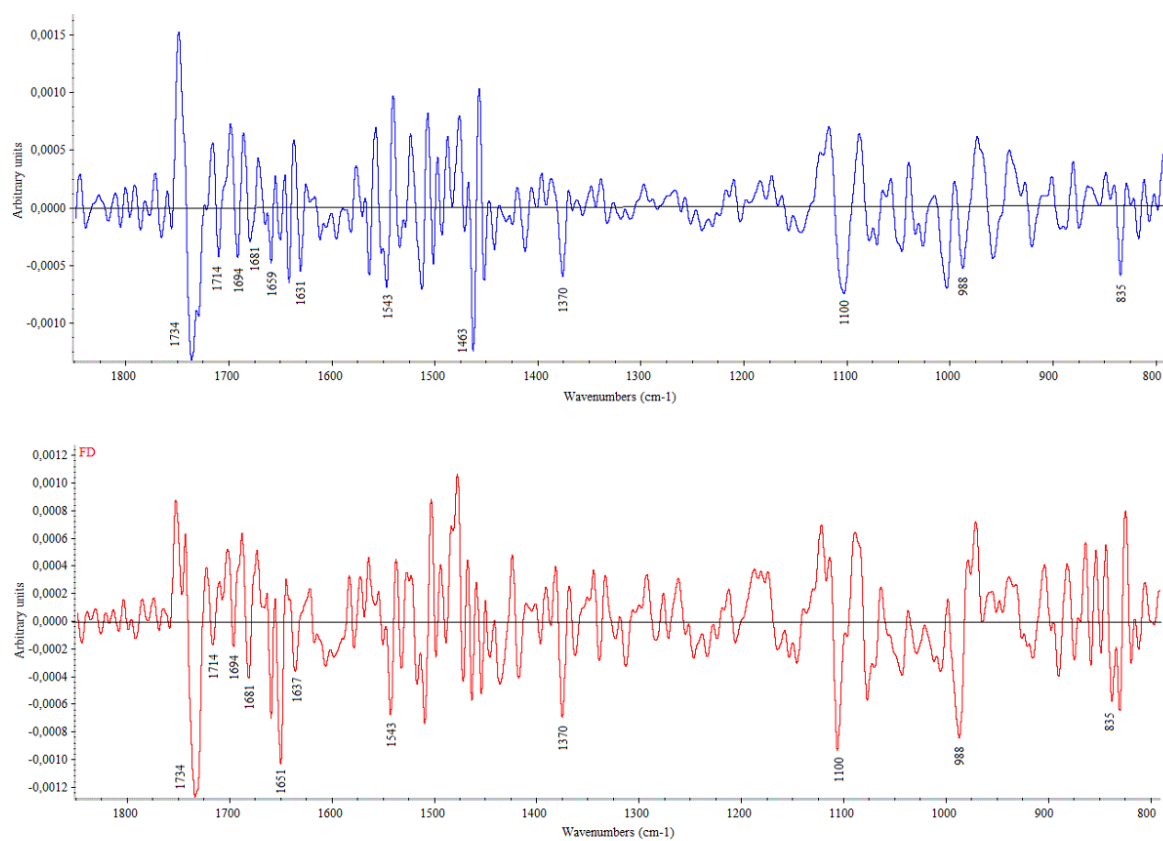

Supplement: s1 [file s1]
